# Supplementary material for: Formulation of Polymeric Microparticles Using Eco-Friendly Extracted Crude Fucoidans from Edible Brown Seaweed Undaria pinnatifida
Source: MDPI journal article supplement (doi:10.3390/foods12091859), 2023-04-29
Supplement: s1 [file s1]

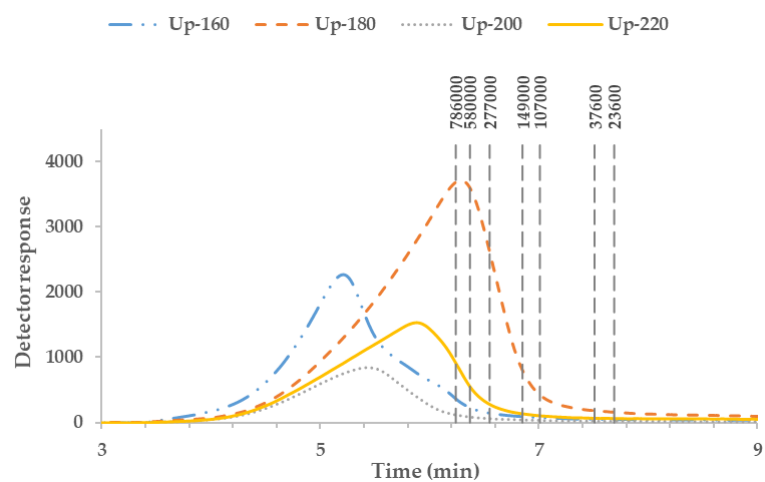

Figure S1. Supplementary. Molar mass distribution of the extracts obtained from *U. pinnatifida* at 160, 180, 200 and 220 °C by pressurized hot water extraction.
